# Supplementary material
Source: PubMed Central journal article supplement (PMC9339586)
Supplement: NIHMS1783831-supplement-Supplemental_Material.pdf [file NIHMS1783831-supplement-Supplemental_Material.pdf]

## Supplemental Material

**Supplemental Table 1. Demographic, cognitive, and clinical characteristic of *PSEN1* carriers and non-carriers**

|                                       | <b>PSEN1 Mutation Carriers<br/>(n=167)</b> | <b>Non-carriers<br/>(n=75)</b> | <b><i>p</i> value</b> |
|---------------------------------------|--------------------------------------------|--------------------------------|-----------------------|
| <b>Age (range)</b>                    | 37 ± 5 (30-53)                             | 42 ± 6 (30-53)                 | <.001                 |
| <b>Sex (n [%] Female)</b>             | 101 (60%)                                  | 50 (67%)                       | .36                   |
| <b>Education</b>                      | 8.8 ± 4.1                                  | 8.5 ± 4.4                      | .64                   |
| <b>CDR Global</b>                     | 0.05 ± 0.2                                 | 0.03 ± 0.1                     | .38                   |
| <b>GDS</b>                            | 1.35 ± 1.83                                | 1.19 ± 1.81                    | .53                   |
| <b>MMSE</b>                           | 28.8 ± 1.4                                 | 29.2 ± 1.0                     | .01                   |
| <b>CERAD Word List Learning</b>       | 20.1 ± 4.2                                 | 21.13 ± 4.0                    | .07                   |
| <b>CERAD Word List Delayed Recall</b> | 6.9 ± 2.2                                  | 7.7 ± 1.9                      | .01                   |

**Note.** Abbreviations: CDR, Clinical Dementia Rating Scale; MMSE, Mini-Mental Status Exam; CERAD, Consortium to Establish a Registry for AD.
